# Supplementary material for: Data mining on identifying diagnosis and prognosis biomarkers in head and neck squamous carcinoma
Source: Sci Rep. 2023 Jun 20;13:10020. doi: 10.1038/s41598-023-37216-8 (PMC10282046; doi:10.1038/s41598-023-37216-8)
Supplement: Supplementary file 1 — Supplementary Information 1. [file 41598_2023_37216_MOESM1_ESM.xlsx]

## Sheet: Sheet1
gene	Description	Degree
FN1	UP	31
COL3A1	UP	28
COL1A1	UP	27
COL1A2	UP	25
ACTN2	DOWN	24
COL5A1	UP	24
COL4A1	UP	22
COL5A2	UP	22
COL4A2	UP	21
TTN	DOWN	20
COL11A1	UP	20
COL6A3	UP	19
COL4A5	UP	18
POSTN	UP	18
COL7A1	UP	17
LDB3	DOWN	16
MYH7	DOWN	16
NEB	DOWN	15
COL5A3	UP	15
COL27A1	UP	15
MYOM2	DOWN	15
MYH11	DOWN	15
ACAN	UP	14
MYBPC1	DOWN	14
ITGA11	UP	14
COL22A1	UP	14
MYH6	DOWN	13
LAMA3	UP	13
ADAMTS14	UP	13
MYH2	DOWN	13
MYH1	DOWN	13
NID2	UP	13
MYOM1	DOWN	13
ATP2A1	DOWN	13
RBFOX1	DOWN	11
MMP13	UP	10
ANK2	DOWN	10
CDH11	UP	10
NRAP	DOWN	10
SERPINE1	UP	9
LAMA1	UP	9
MYPN	DOWN	9
DLG2	DOWN	8
TNXB	DOWN	7
FAP	UP	7
CFTR	DOWN	7
ATP1A2	DOWN	7
ATP2B2	DOWN	7
TNC	UP	6
MUC5AC	DOWN	6
ADAMTS12	UP	6
ADCY2	DOWN	6
CMYA5	DOWN	6
XIRP2	DOWN	6
CTNNA3	DOWN	6
FBN2	UP	6
MUC5B	DOWN	5
CP	DOWN	5
KIF4A	UP	5
CACNA1S	DOWN	5
PPP1R3A	DOWN	5
ERBB4	DOWN	4
ADAMTS20	UP	4
HTR7	UP	4
MMRN1	DOWN	4
SORBS1	DOWN	4
PYGM	DOWN	4
PRG4	DOWN	4
CACNA1B	UP	4
PPP1R9A	DOWN	4
PXDN	UP	4
CAPN6	DOWN	4
NTRK3	DOWN	4
MUC4	DOWN	3
SCN4A	DOWN	3
ADAMTS6	UP	3
BPIFB2	DOWN	3
MC5R	DOWN	3
GPR39	UP	3
ENPP3	DOWN	3
KIF14	UP	3
GTSE1	UP	3
ATP12A	DOWN	3
LRRTM1	DOWN	3
ASB4	DOWN	3
CILP	DOWN	3
CHL1	DOWN	3
PEG3	DOWN	3
EYA1	DOWN	3
SEMA3E	DOWN	3
LAMB4	DOWN	3
OCA2	DOWN	3
ROBO2	DOWN	3
GABRB3	DOWN	3
CDH19	DOWN	3
GFRA1	DOWN	3
NRG3	DOWN	2
C7	DOWN	2
SSTR1	DOWN	2
SPDEF	DOWN	2
SLC4A4	DOWN	2
DMBT1	DOWN	2
ARPP21	DOWN	2
SORBS2	DOWN	2
ANO5	DOWN	2
DNMT3B	UP	2
CLSPN	UP	2
DSCAM	UP	2
DUSP27	DOWN	2
PPP4R4	UP	2
MAPT	DOWN	2
NETO1	UP	2
C6	DOWN	1
KIF26B	UP	1
SCN7A	DOWN	1
PGM5	DOWN	1
CPNE4	DOWN	1
SLITRK5	DOWN	1
NLRP7	UP	1
PAX1	DOWN	1
FOXI1	DOWN	1
FNDC1	UP	1
SYNPO2	DOWN	1
CNGB1	UP	1
CTTNBP2	DOWN	1
CNGB3	UP	1
MAGEA12	UP	1
ATP13A5	DOWN	1
ANKS1B	DOWN	1
NOS1	DOWN	1
CADM2	DOWN	1
TRPV6	DOWN	1
PLCXD3	DOWN	1
CYP2E1	DOWN	1
AOX1	DOWN	1
SERPINA9	UP	1
TENM2	UP	1
PCSK2	DOWN	1
CCDC129	DOWN	1
TRPA1	UP	1
COBL	DOWN	1
ARHGAP36	DOWN	1
SLITRK4	DOWN	1
SERPINA5	DOWN	1
